# Supplementary material for: Enhanced white rot control in garlic bulbil using organic–inorganic hybrid materials as coating membranes
Source: Royal Society of Chemistry journal article supplement (doi:10.1039/d4dt00301b), 2024-01-01
Supplement: d4dt00301b1.pdf [file d4dt00301b1.pdf]

## Supporting Information

### Enhanced White Rot Control in Garlic Bulbils Using Organic-Inorganic Hybrid Materials as Coating Membranes

Lorena Alves de Melo Bessa,<sup>\*a</sup> Mariane Luisa Ferreira Nazário,<sup>a</sup> Celly Mieko Shinohara Izumi,<sup>b</sup> Vera Regina Leopoldo Constantino,<sup>c</sup> Valdir Lourenço Júnior,<sup>d</sup> Everaldo Antônio Lopes,<sup>a</sup> Eduardo Seiti Gomide Mizubuti,<sup>e</sup> Jairo Tronto <sup>a</sup>.

<sup>a</sup> Instituto de Ciências Exatas e Tecnológicas, Universidade Federal de Viçosa, Campus Rio Paranaíba, CEP 38810-000, Rio Paranaíba, MG, Brazil.

<sup>b</sup> Departamento de Química, Instituto de Ciências Exatas, Universidade Federal de Juiz de Fora, Campus Univeritário, CEP 36036-900, Juiz de Fora, MG, Brazil.

<sup>c</sup> Departamento de Química Fundamental, Instituto de Química, Universidade de São Paulo, Av. Prof. Lineu Prestes 748, CEP 05508-000, São Paulo, SP, Brazil.

<sup>d</sup> Embrapa Hortaliças, CEP 70.351-970, Brasília, Distrito Federal, Brazil.

<sup>e</sup> Departamento de Fitopatologia, Universidade Federal de Viçosa, Campus Viçosa, CEP 36570-900 Viçosa, MG, Brazil.

# 1 Thermogravimetric analysis with differential scanning calorimetry and mass spectrometry (TGA-DSC-MS)

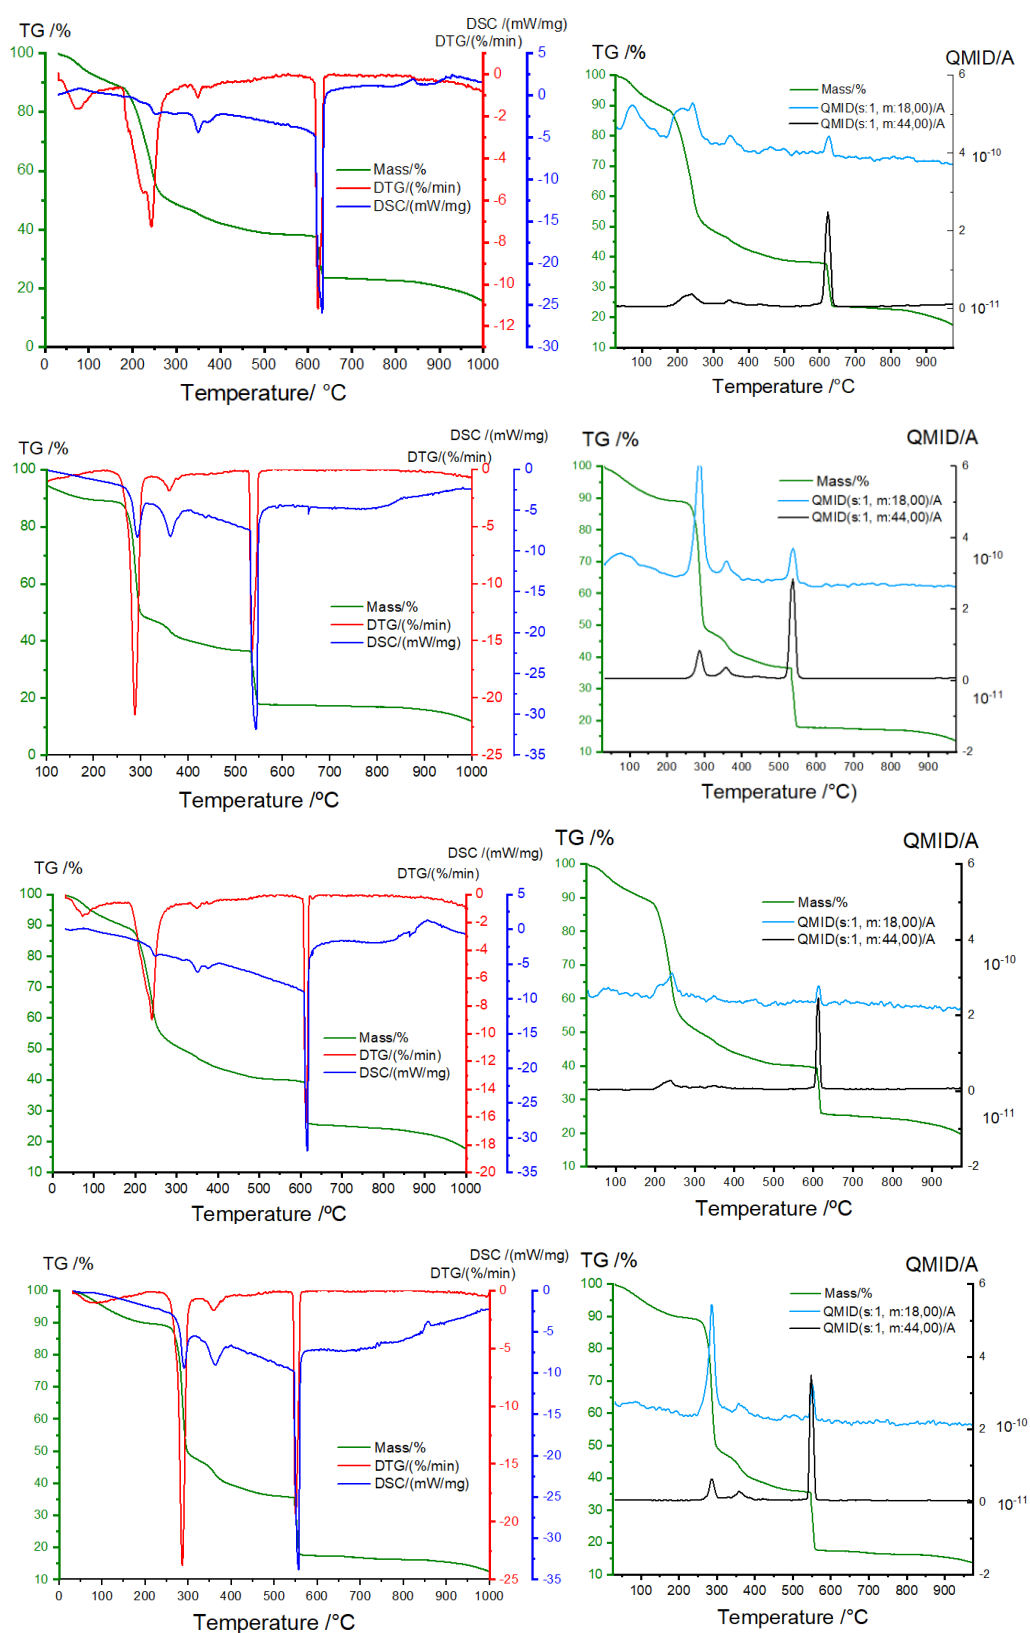

**Figure S1: (A)** TG-DSC-DTG-MS – ALG2-TD e TG-MS – ALG2-TD **(B)** TG-DSC-DTG-MS – CMC2-TD e TG-MS – CMC2-TD. **(C)** TG-DSC-DTG-MS – ALG2-TB e TG-MS – ALG2-TB. **(D)** TG-DSC-DTG-MS CMC2-TB e TG-MS – CMC2-TB.

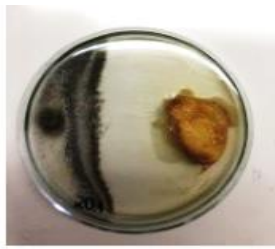

20.1

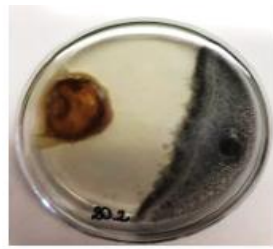

20.2

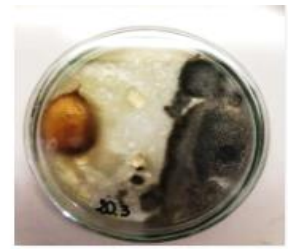

20.3

**Figure S2:** Bulbs coated with polymeric membranes composed of 2% carboxymethylcellulose solution and 2% Laponita® and Tebuconazole fungicide in the mycelial growth inhibition experiments (20.1 to 20.3).
